# Supplementary material for: Identifying metalloproteins through X-ray fluorescence mapping and mass spectrometry
Source: Royal Society of Chemistry journal article supplement (doi:10.1039/c2mt20095c), 2012-01-01

Supplementary figure 2. Addition of  $Zn^{2+}$  to LB media containing 1 mM EDTA suppresses EDTA sensitivity of the deletion mutant strain PA5217. All metals were added as chloride salts at 200  $\mu$ M. Bars represent the mean value of three independent experiments (black, *P. aeruginosa* PAO1; white, deletion mutant PA5217). Error bars are SE.

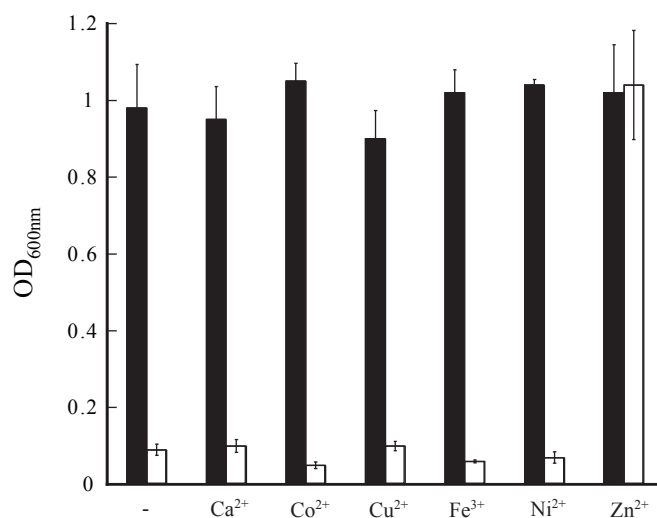

Supplement: c2mt20095c_2.pdf [file c2mt20095c_2.pdf]
